# Supplementary material for: Transport stress induces weight loss and heart injury in chicks: disruption of ionic homeostasis via modulating ion transporting ATPases
Source: PubMed Central journal article supplement (PMC5421834; doi:10.18632/oncotarget.15903), 2017-03-04
Supplement: oncotarget-08-24142-s001.pdf [file oncotarget-08-24142-s001.pdf]

## Transport stress induces weight loss and heart injury in chicks: disruption of ionic homeostasis via modulating ion transporting ATPases

### Supplementary Material

Table S1. Oligonucleotides used in the present study.

|                                                             | Gene    | Forward Primer (5'→3')    | Reverse Primer (5'→3')         | Product length | NCBI accession No. |
|-------------------------------------------------------------|---------|---------------------------|--------------------------------|----------------|--------------------|
| House keeper                                                | GAPDH   | CTTTGGCATTGTGGAGGGTC      | ACGCTGGGATGATGTTCTGG           | 128 bp         | NM_204305.1        |
|                                                             | β-actin | AGTACCCCATGAACACGGC       | CTCCTCAGGGGCTACTCTCA           | 98 bp          | NM_205518.1        |
| Na <sup>+</sup> -K <sup>+</sup> -ATPase associated subunits | 1A1     | TACAGCCTTCTTTGTCAGCA      | CAGCTAGAGCAGTCTCCTCGAA         | 140 bp         | NM_205521.1        |
|                                                             | 1A2     | GCCGCTGTCGTCATTGTCA       | TCTCCGCGTTGATTGGAT             | 142 bp         | NM_205476.1        |
|                                                             | 1A3     | CCATCCTCAAGCGTGACGTG      | ACTTTGACGGACCCGGACGA           | 85 bp          | NM_205475.1        |
|                                                             | 1B3     | GCAGTTCGTCTACAACCCCA      | TAAGCCCTGGACTAGAAATCCG         | 194 bp         | NM_205535.1        |
|                                                             | 1B4     | GCCAGGAGTAATGATCAGACCA    | TCATCGTAAGCTGCTAGGAAC          | 120 bp         | NM_001044651.1     |
| Ca <sup>2+</sup> -ATPase associated subunits                | 2A2     | GCGATTTGCTTGCCATGTCAC     | ATCAGCCATTGCGTCACGTT           | 101 bp         | NM_001271973.1     |
|                                                             | 2A3     | ACATCCGCATCATTGAAATCCG    | ACCCCTGTTGCAATGACGAT           | 199 bp         | NM_204891.1        |
|                                                             | 2B1     | GAAACAAAAGTGAATGTGCCTTGCT | GCAACTTCTCTTCTGGTATCTCATTCCGTA | 93bp           | NM_001168002.3     |
|                                                             | 2B2     | CTGCCATCTGCTGTCTGTATCTGTG | CCACGAAACTGCTTCTCCTTGCTCC      | 79bp           | XM_015293479.1     |
|                                                             | 2B4     | AGAAAGCCAAGACGTTCC        | AATTCATTGTGCCACCT              | 130bp          | XM_015298965.1     |
|                                                             | 2C1     | TTGCCTTTGTTCCAGGAGTACCGAT | TTCCACTCTACCTTCTCGCACAC        | 98bp           | XM_015281760.1     |

**Table S2. Total Variance Explained of PCA for Figure 7A**

**Total Variance Explained**

| Component | Initial Eigenvalues |               |              | Extraction Sums of Squared Loadings |               |              | Rotation Sums of Squared Loadings |               |              |
|-----------|---------------------|---------------|--------------|-------------------------------------|---------------|--------------|-----------------------------------|---------------|--------------|
|           | Total               | % of Variance | Cumulative % | Total                               | % of Variance | Cumulative % | Total                             | % of Variance | Cumulative % |
|           | 1                   | 10.636        | 62.562       | 62.562                              | 10.636        | 62.562       | 62.562                            | 5.936         | 34.919       |
| 2         | 3.629               | 21.348        | 83.910       | 3.629                               | 21.348        | 83.910       | 5.815                             | 34.209        | 69.127       |
| 3         | 2.156               | 12.682        | 96.592       | 2.156                               | 12.682        | 96.592       | 4.669                             | 27.465        | 96.592       |
| 4         | .193                | 1.138         | 97.730       |                                     |               |              |                                   |               |              |
| 5         | .129                | .760          | 98.490       |                                     |               |              |                                   |               |              |
| 6         | .075                | .441          | 98.931       |                                     |               |              |                                   |               |              |
| 7         | .055                | .322          | 99.253       |                                     |               |              |                                   |               |              |
| 8         | .045                | .263          | 99.516       |                                     |               |              |                                   |               |              |
| 9         | .036                | .211          | 99.727       |                                     |               |              |                                   |               |              |
| 10        | .016                | .095          | 99.822       |                                     |               |              |                                   |               |              |
| 11        | .011                | .066          | 99.888       |                                     |               |              |                                   |               |              |
| 12        | .008                | .048          | 99.936       |                                     |               |              |                                   |               |              |
| 13        | .005                | .029          | 99.965       |                                     |               |              |                                   |               |              |
| 14        | .003                | .016          | 99.980       |                                     |               |              |                                   |               |              |
| 15        | .002                | .014          | 99.995       |                                     |               |              |                                   |               |              |
| 16        | .001                | .004          | 99.999       |                                     |               |              |                                   |               |              |
| 17        | .000                | .001          | 100.000      |                                     |               |              |                                   |               |              |

Extraction Method: Principal Component Analysis.

**Table S3. Total Variance Explained of PCA for Figure 7B.**

| Component | Total Variance Explained |               |              |                                     |               |              |                                   |               |              |
|-----------|--------------------------|---------------|--------------|-------------------------------------|---------------|--------------|-----------------------------------|---------------|--------------|
|           | Initial Eigenvalues      |               |              | Extraction Sums of Squared Loadings |               |              | Rotation Sums of Squared Loadings |               |              |
|           | Total                    | % of Variance | Cumulative % | Total                               | % of Variance | Cumulative % | Total                             | % of Variance | Cumulative % |
| 1         | 9.924                    | 49.619        | 49.619       | 9.924                               | 49.619        | 49.619       | 9.813                             | 49.065        | 49.065       |
| 2         | 8.145                    | 40.725        | 90.343       | 8.145                               | 40.725        | 90.343       | 8.184                             | 40.921        | 89.985       |
| 3         | 1.252                    | 6.260         | 96.604       | 1.252                               | 6.260         | 96.604       | 1.324                             | 6.618         | 96.604       |
| 4         | .365                     | 1.826         | 98.430       |                                     |               |              |                                   |               |              |
| 5         | .183                     | .914          | 99.344       |                                     |               |              |                                   |               |              |
| 6         | .058                     | .288          | 99.632       |                                     |               |              |                                   |               |              |
| 7         | .045                     | .223          | 99.855       |                                     |               |              |                                   |               |              |
| 8         | .029                     | .145          | 100.000      |                                     |               |              |                                   |               |              |
| 9         | 3.455E-16                | 1.727E-15     | 100.000      |                                     |               |              |                                   |               |              |
| 10        | 3.248E-16                | 1.624E-15     | 100.000      |                                     |               |              |                                   |               |              |
| 11        | 2.725E-16                | 1.363E-15     | 100.000      |                                     |               |              |                                   |               |              |
| 12        | 2.053E-16                | 1.026E-15     | 100.000      |                                     |               |              |                                   |               |              |
| 13        | 1.144E-16                | 5.718E-16     | 100.000      |                                     |               |              |                                   |               |              |
| 14        | 8.443E-17                | 4.222E-16     | 100.000      |                                     |               |              |                                   |               |              |
| 15        | -3.947E-17               | -1.973E-16    | 100.000      |                                     |               |              |                                   |               |              |
| 16        | -9.499E-17               | -4.750E-16    | 100.000      |                                     |               |              |                                   |               |              |
| 17        | -2.070E-16               | -1.035E-15    | 100.000      |                                     |               |              |                                   |               |              |
| 18        | -3.262E-16               | -1.631E-15    | 100.000      |                                     |               |              |                                   |               |              |
| 19        | -4.144E-16               | -2.072E-15    | 100.000      |                                     |               |              |                                   |               |              |
| 20        | -4.729E-16               | -2.364E-15    | 100.000      |                                     |               |              |                                   |               |              |

Extraction Method: Principal Component Analysis.
